# Supplementary material for: Inflammatory and cytotoxic effects of bifenthrin in primary microglia and organotypic hippocampal slice cultures
Source: Springer Nature journal article supplement (doi:10.1186/s12974-018-1198-1), 2018-05-24

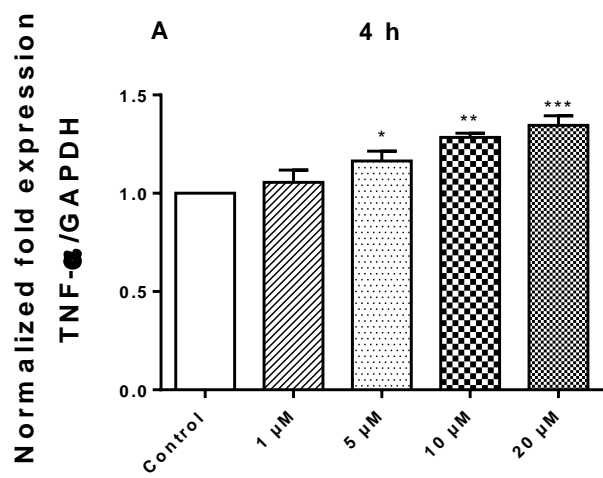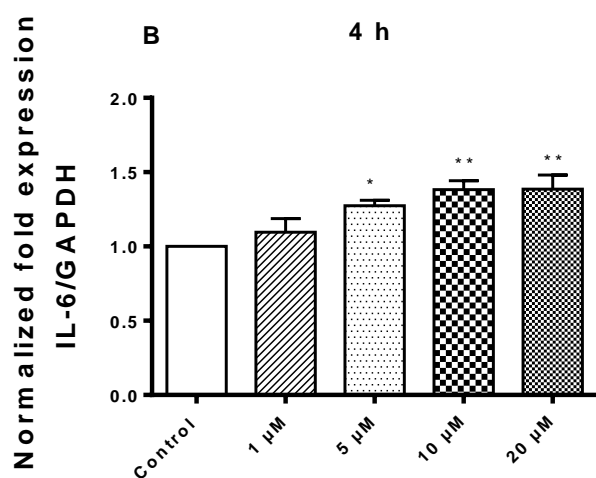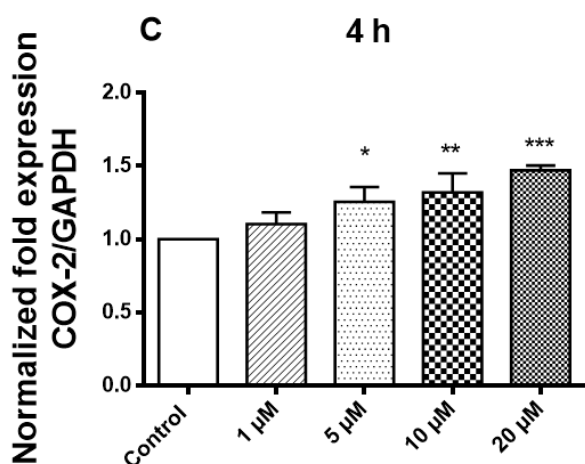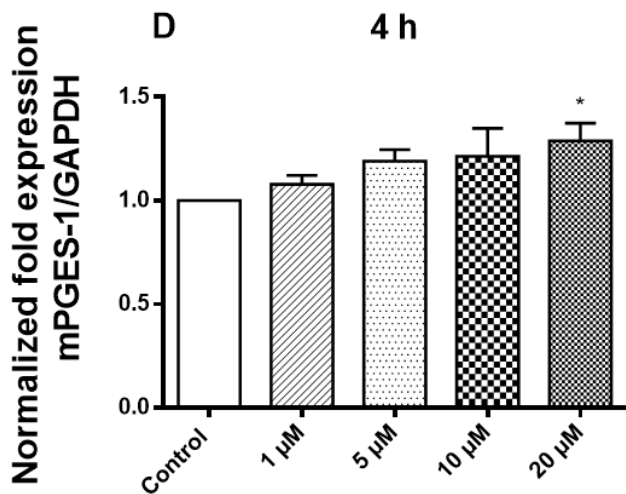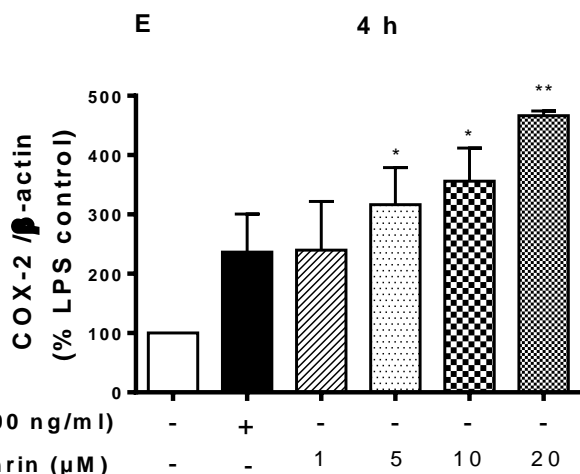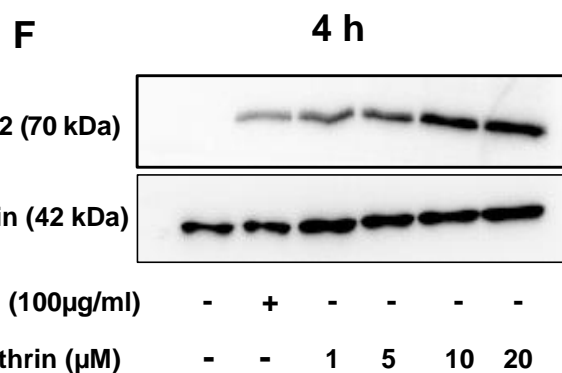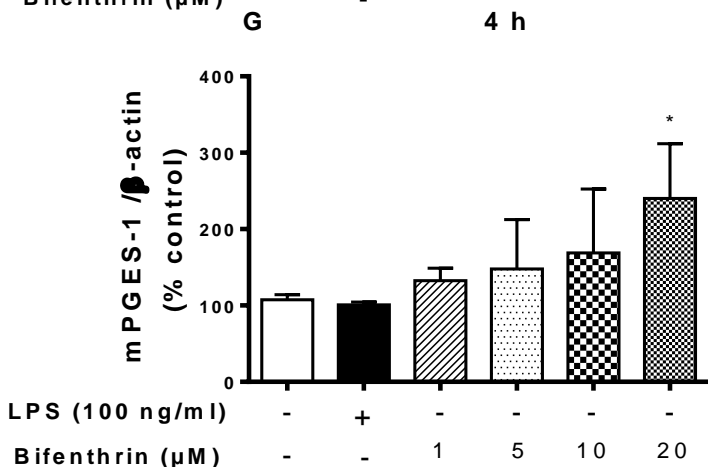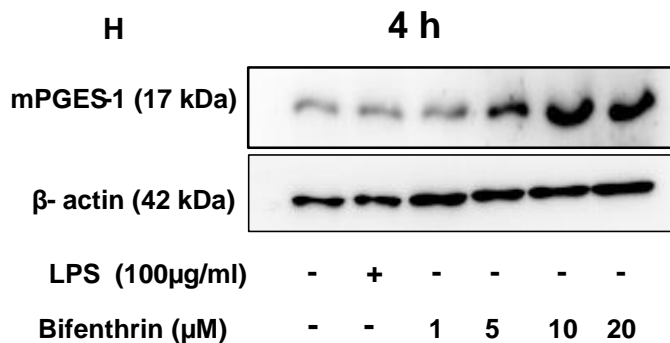

Supplement: MOESM1 [file 15790436]
